# Supplementary material
Source: publisher figshare collection journal article supplement (https://tandf.figshare.com/ndownloader/files/25762537)
Supplement: Supplementary file 1 [file 25762537]

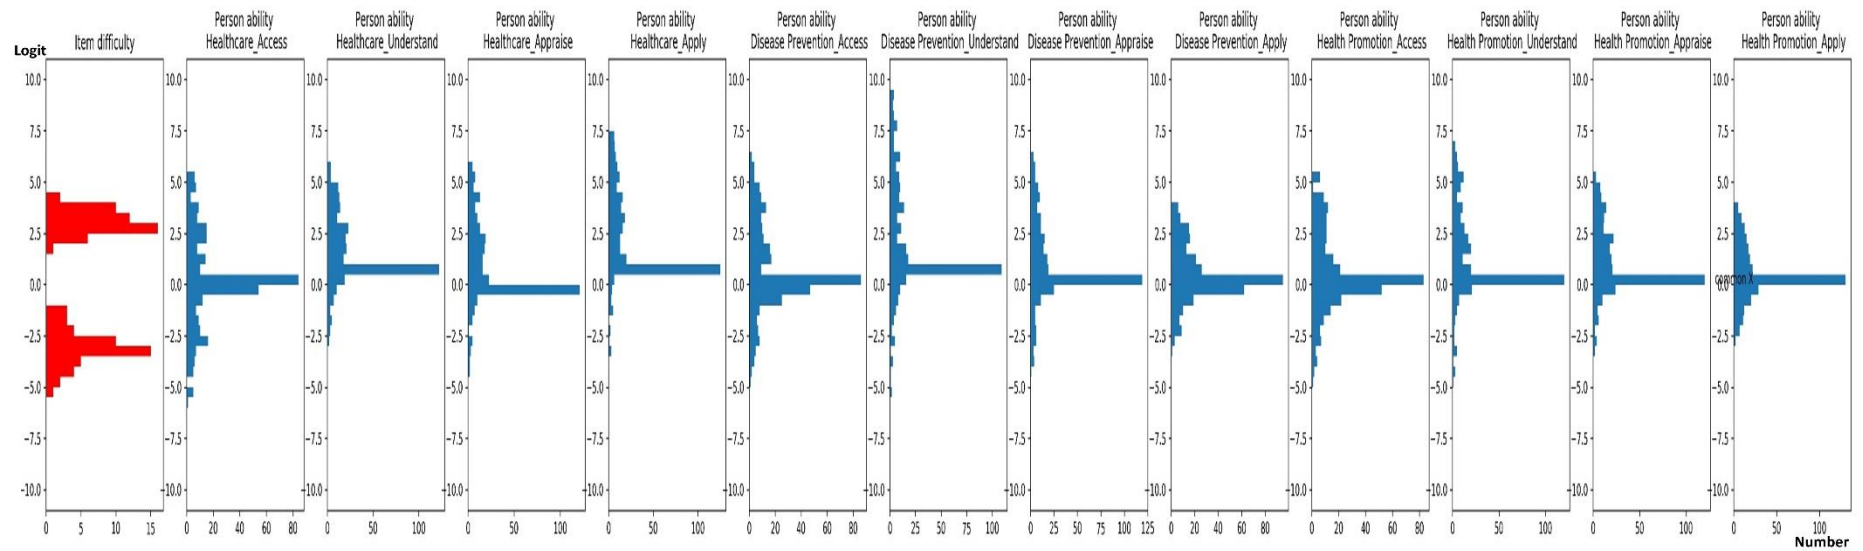

Supplementary Figure 1. Person-item map of the CAT-EHL

Note: The histogram in blue illustrates the distribution of patients' health literacy (bottom [low] to top [high]), and the histogram in red illustrates the distribution of the item category difficulty hierarchy (bottom [easy] to top [difficult]).
